# Supplementary material
Source: HighWire-hosted journal article supplement (https://erj.ersjournals.com/highwire/filestream/113402/field_highwire_adjunct_files/0/IkBzeta_-_IL6_Supplementary_Figures_09-06-2010.pdf)
Supplement: IkBzeta_-_IL6_Supplementary_Figures_09-06-2010.pdf [file IkBzeta_-_IL6_Supplementary_Figures_09-06-2010.pdf]

## Supplementary Figure S1

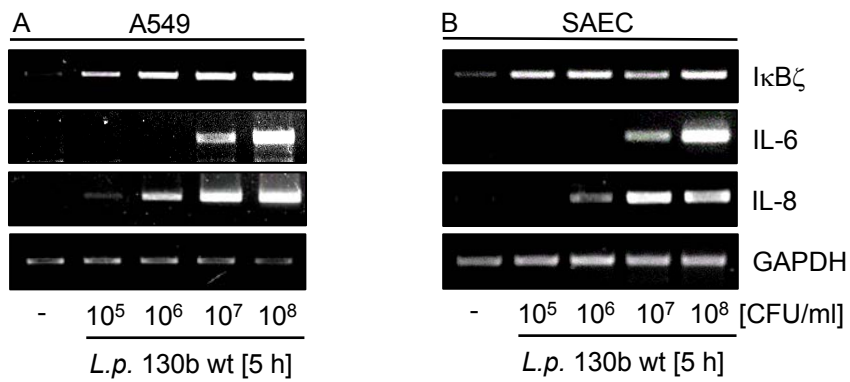

**Figure S1:** *L. pneumophila* induced expression of IL-6 and I $\kappa$ B $\zeta$  in human lung epithelial cells. Alveolar epithelial cells (A549) or human primary small airway epithelial cells (SAEC) were infected with *L. pneumophila* wildtype strain 130b with the indicated concentrations for 5 h. mRNA levels of I $\kappa$ B $\zeta$ , IL-6, IL-8, and GAPDH were detected by RT-PCR. Representative gels of three independent experiments were shown.

## Supplementary Figure S2

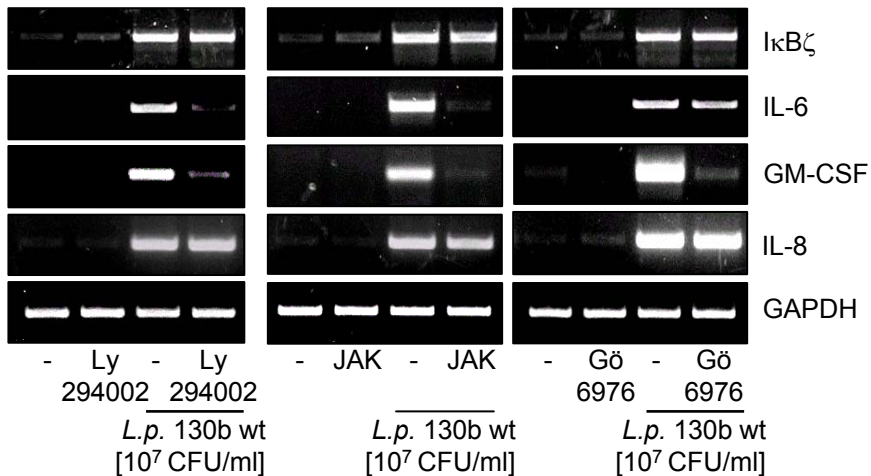

**Figure S2:** Expression of IκBζ mRNA did not depend on PI3-kinase, JAK pathway and classical isoforms of Protein-Kinase C. Alveolar epithelial cells (A549) were preincubated for 120 min. with inhibitors Ly294002 (10 μM), JAK inhibitor I (10 μM) or Gö6976 (10 μM) and then infected with *L. pneumophila* wildtype strain 130b (10<sup>7</sup> CFU/ml). After 7 h, mRNA expression was determined by RT-PCR. Representative gels of three independent experiments were shown.
